# Supplementary material for: Genetics and Pathogenicity of Influenza A (H4N6) Virus Isolated from Wild Birds in Jiangsu Province, China, 2023
Source: Hindawi journal article supplement (doi:10.1155/2024/7421277), 2024-01-01
Supplement: f2 [file 7421277.f2.pdf]

# (a) PB2

2.0

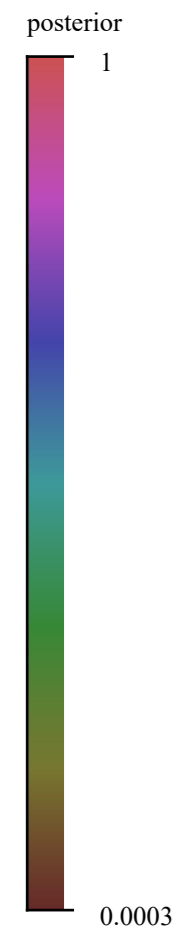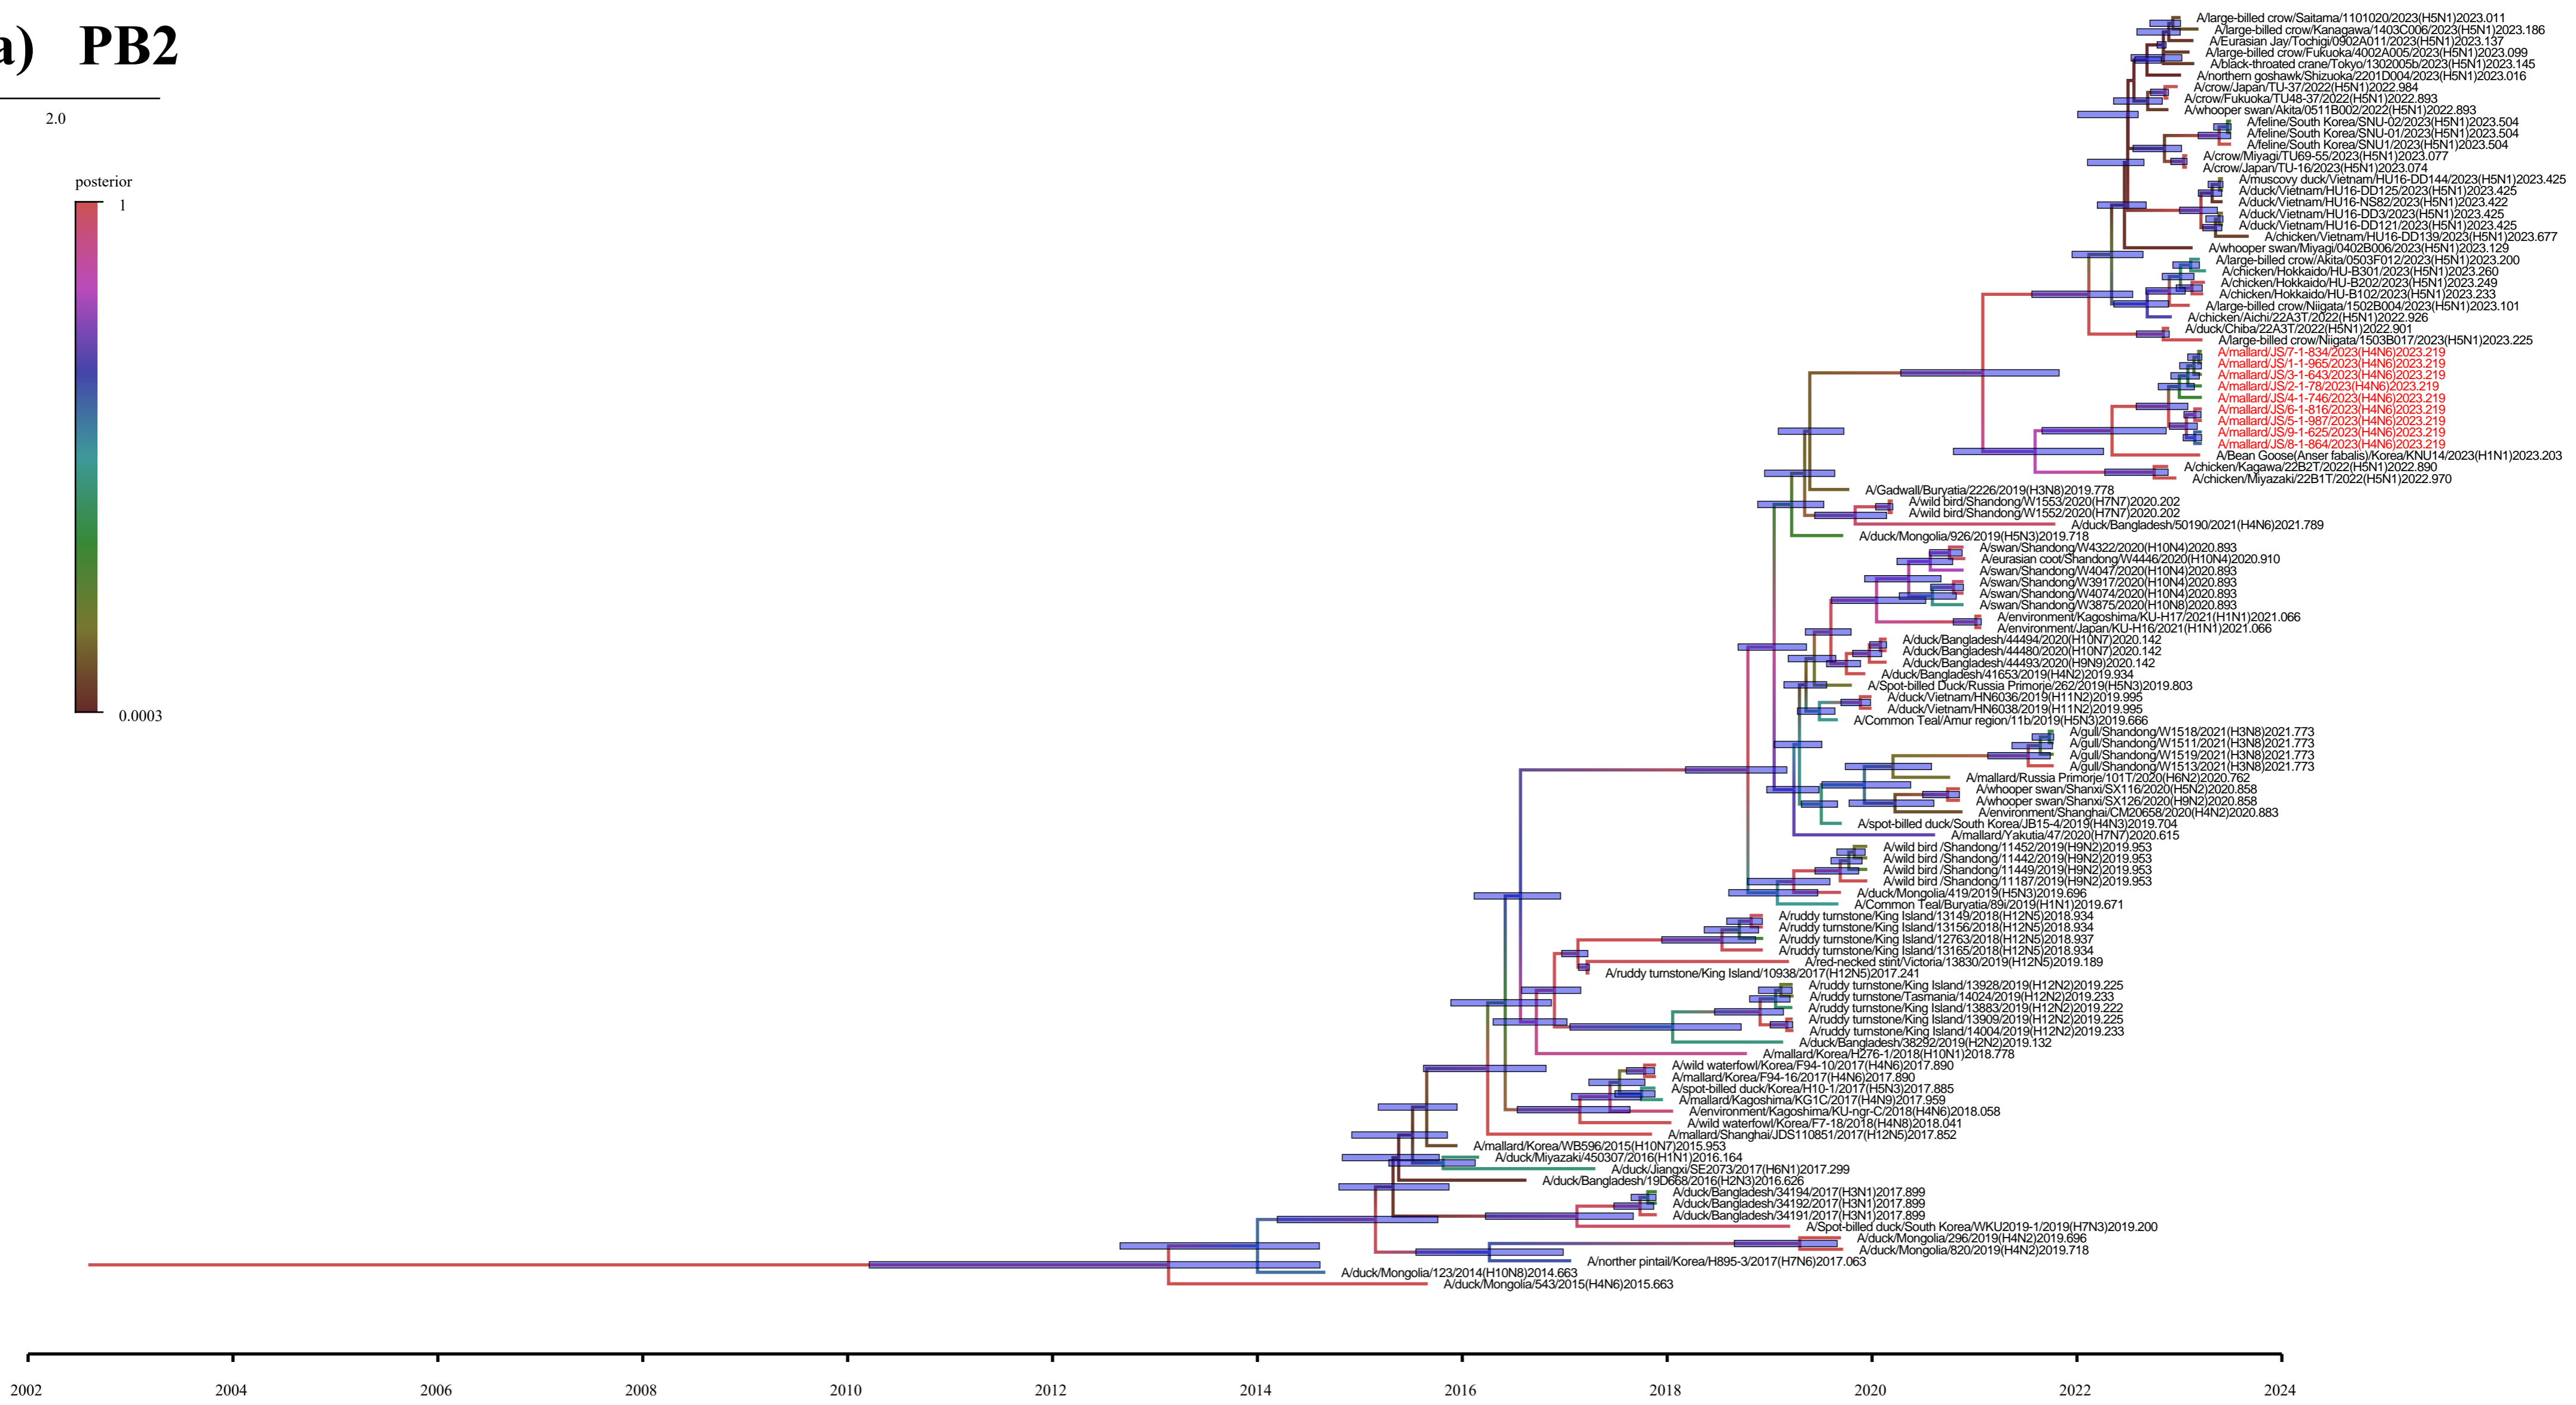

# (b) PB1

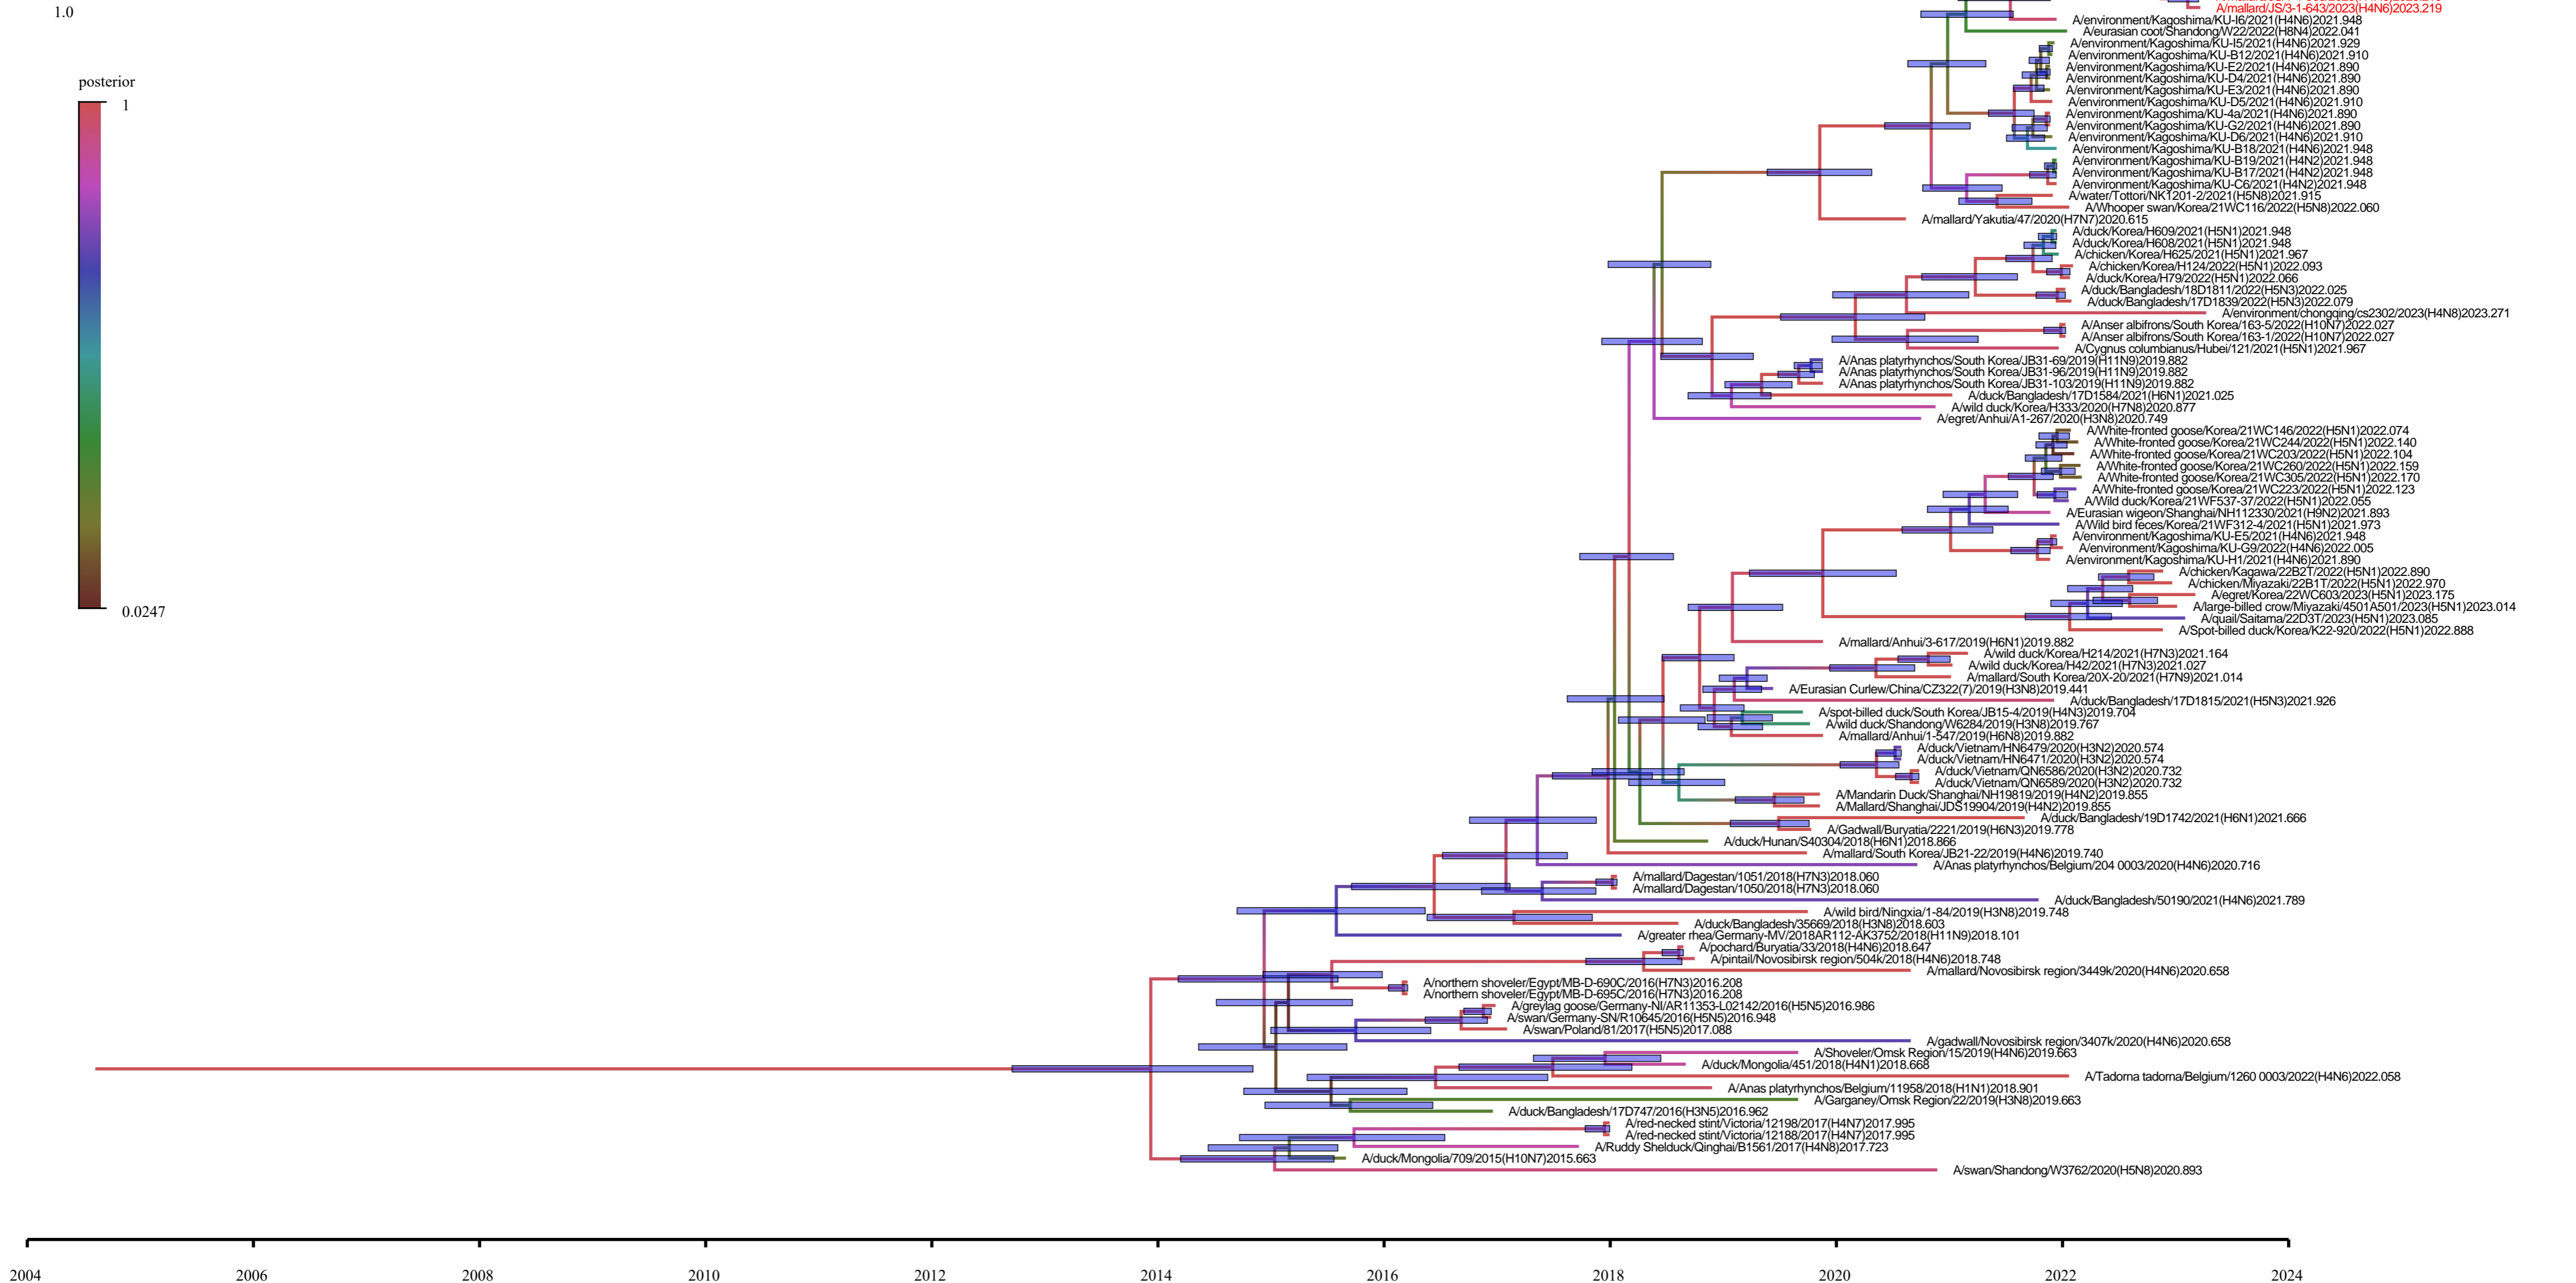

# (c) PA

2.0

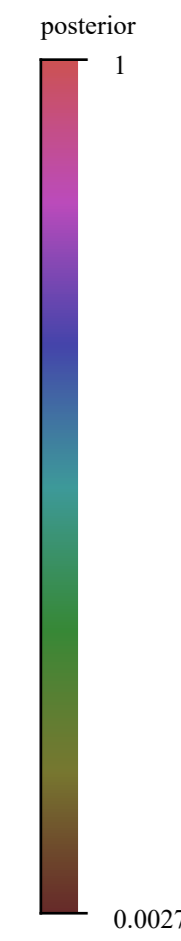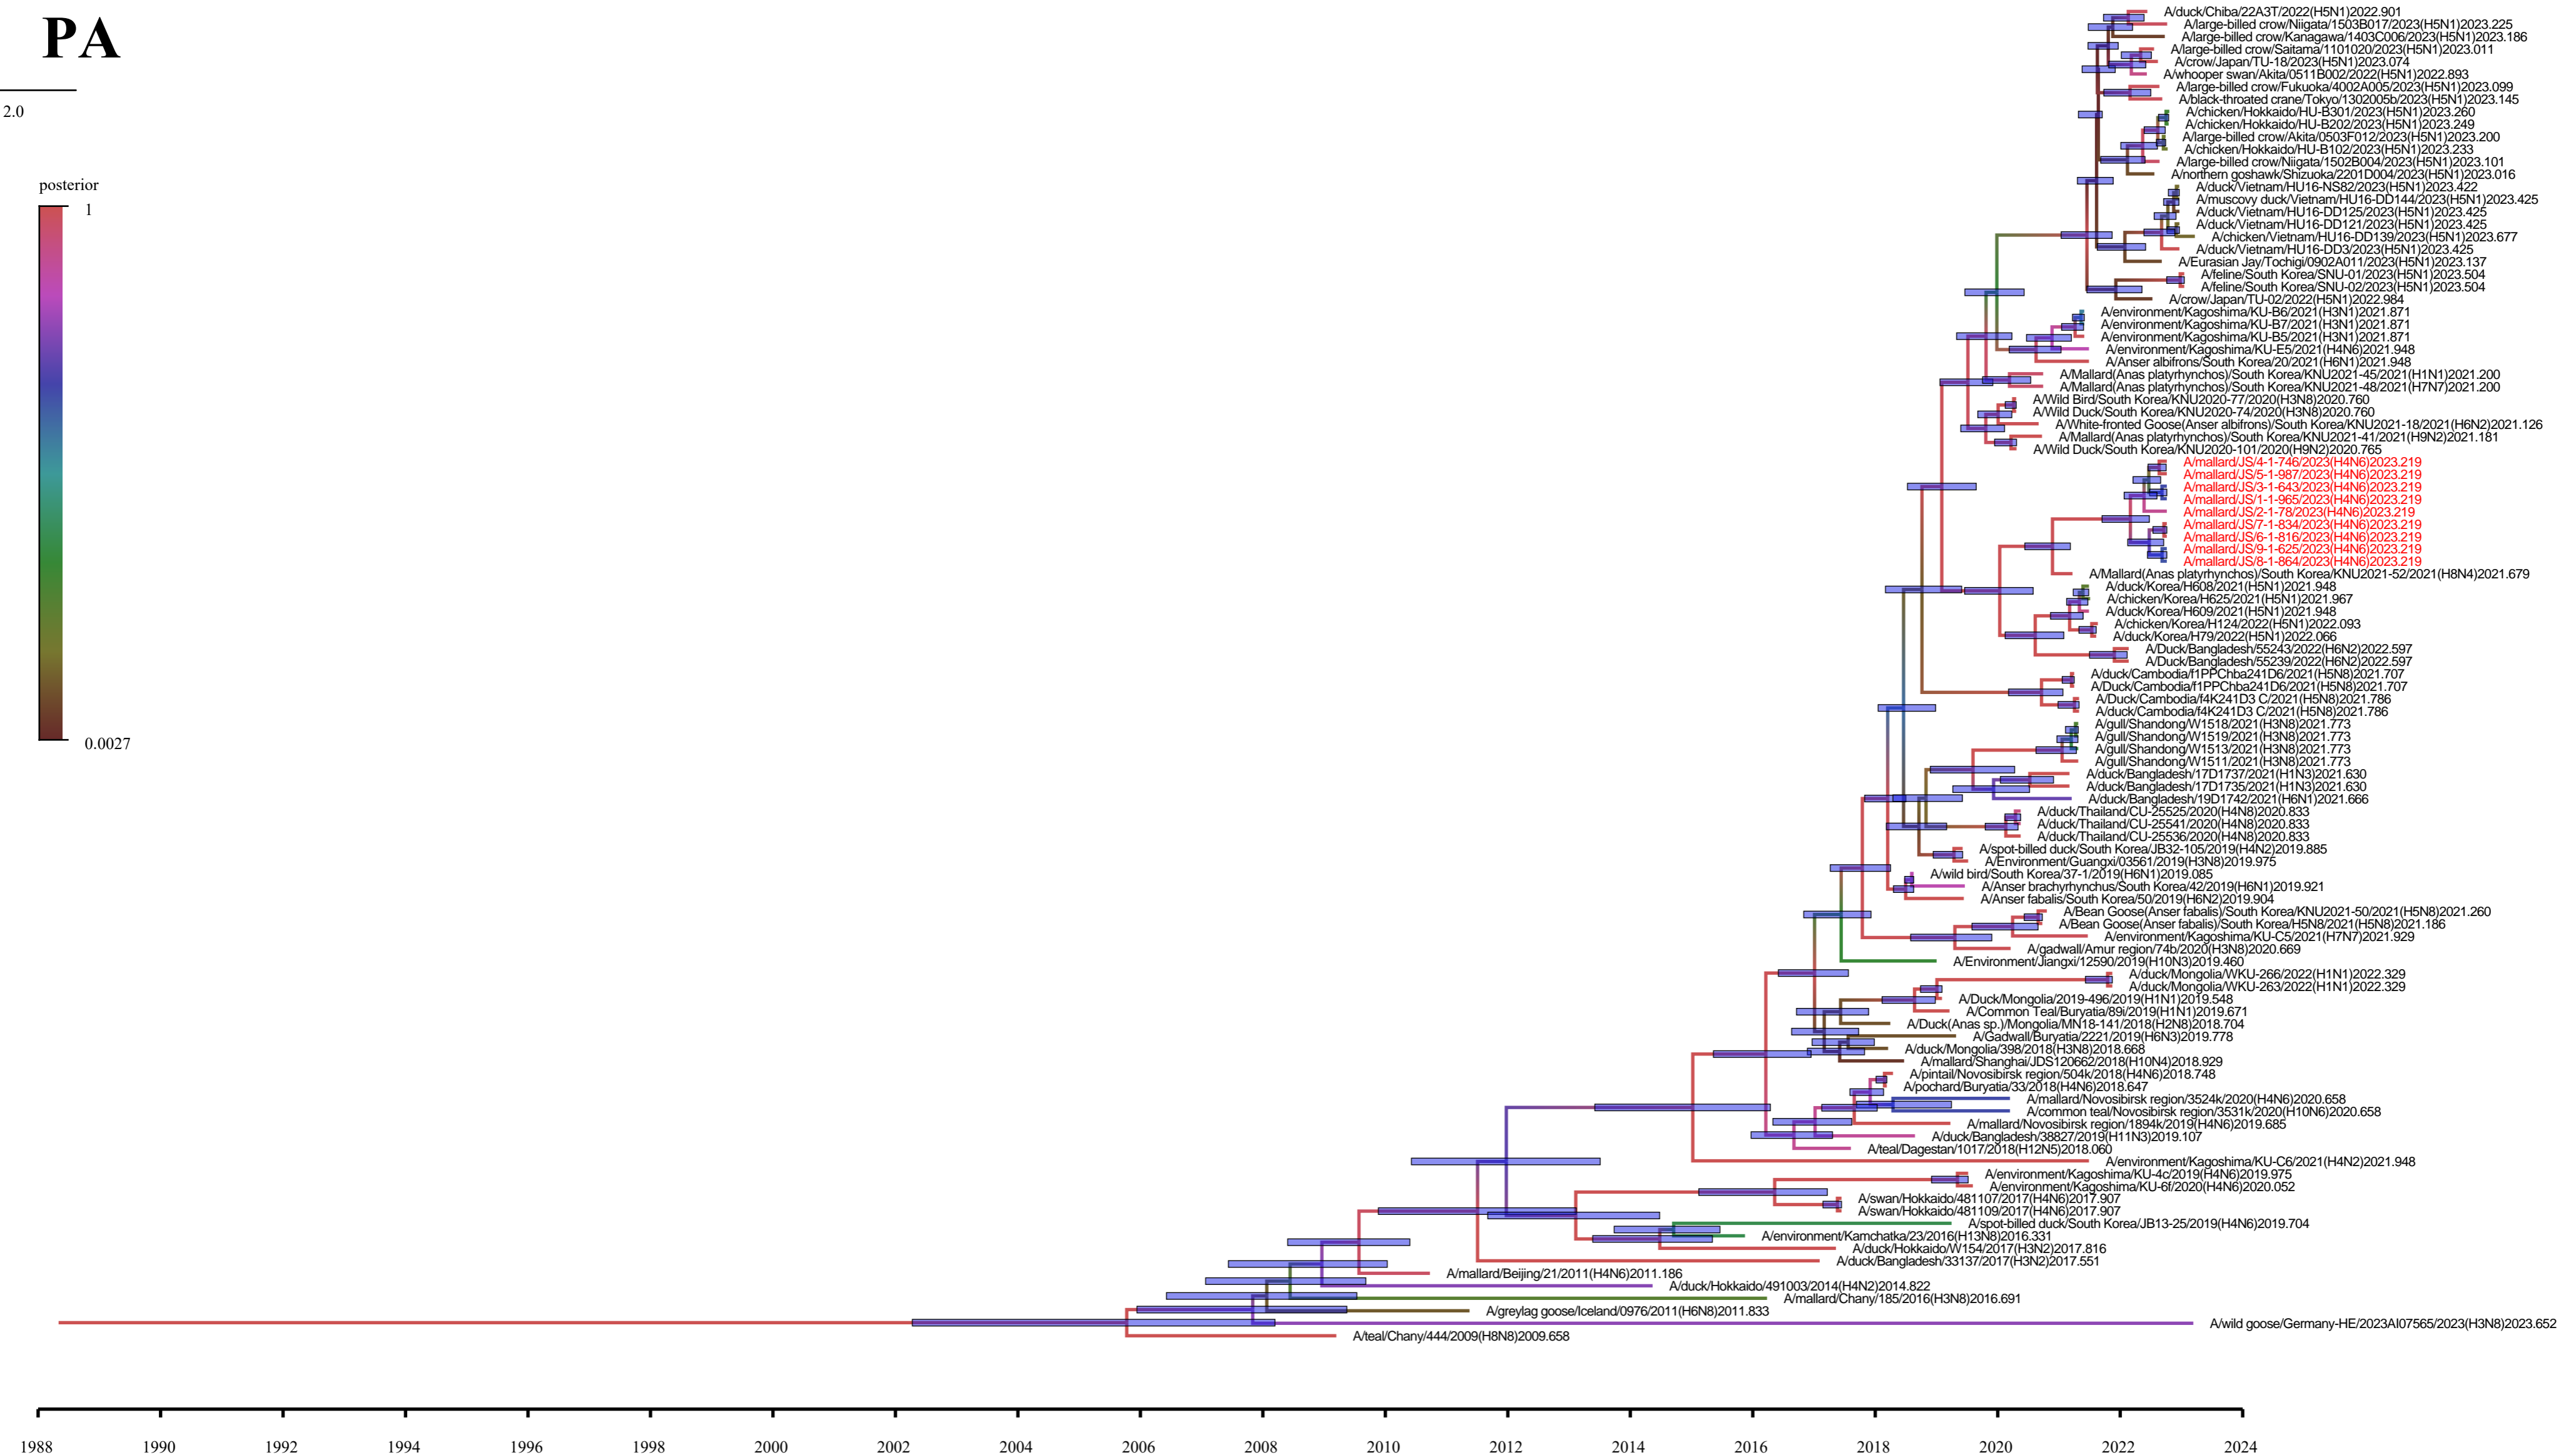

# (d) NP

2.0

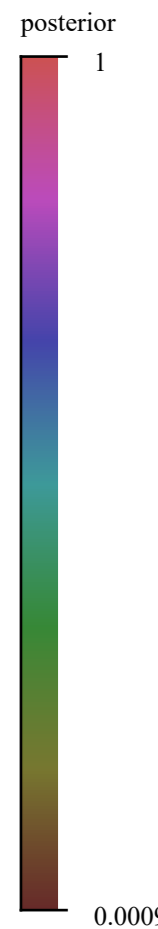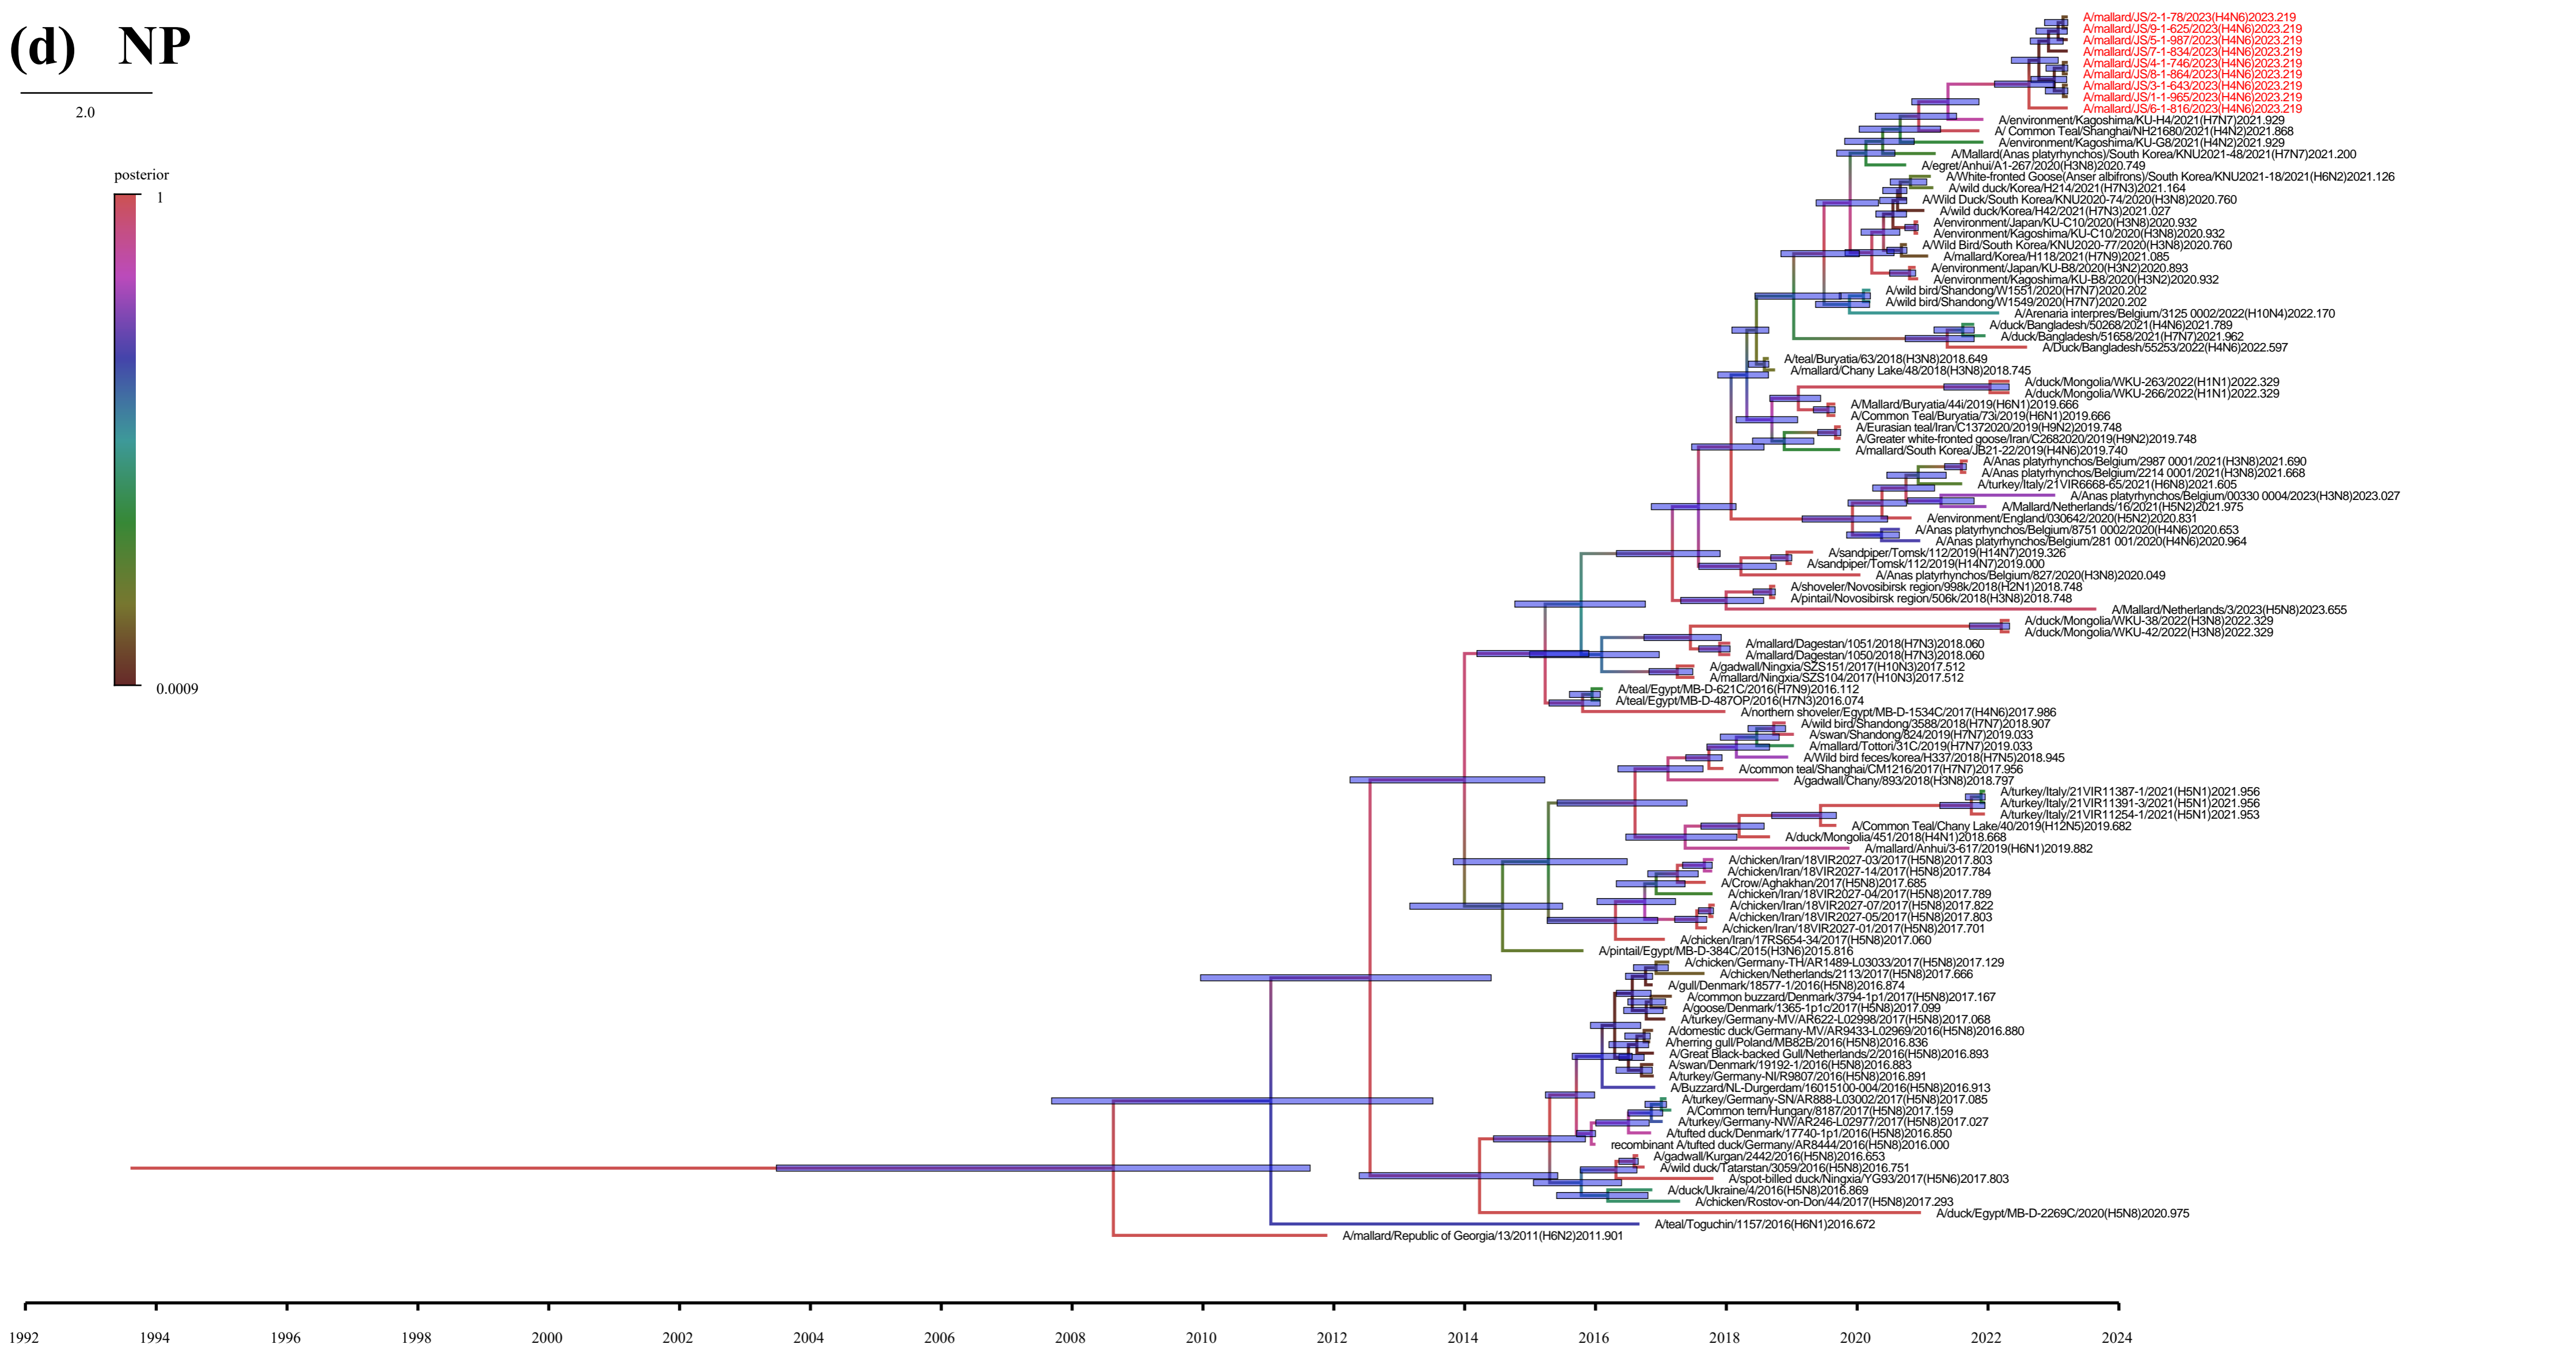

(e) NA

3.0

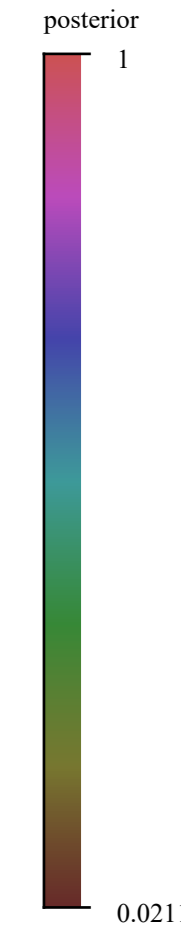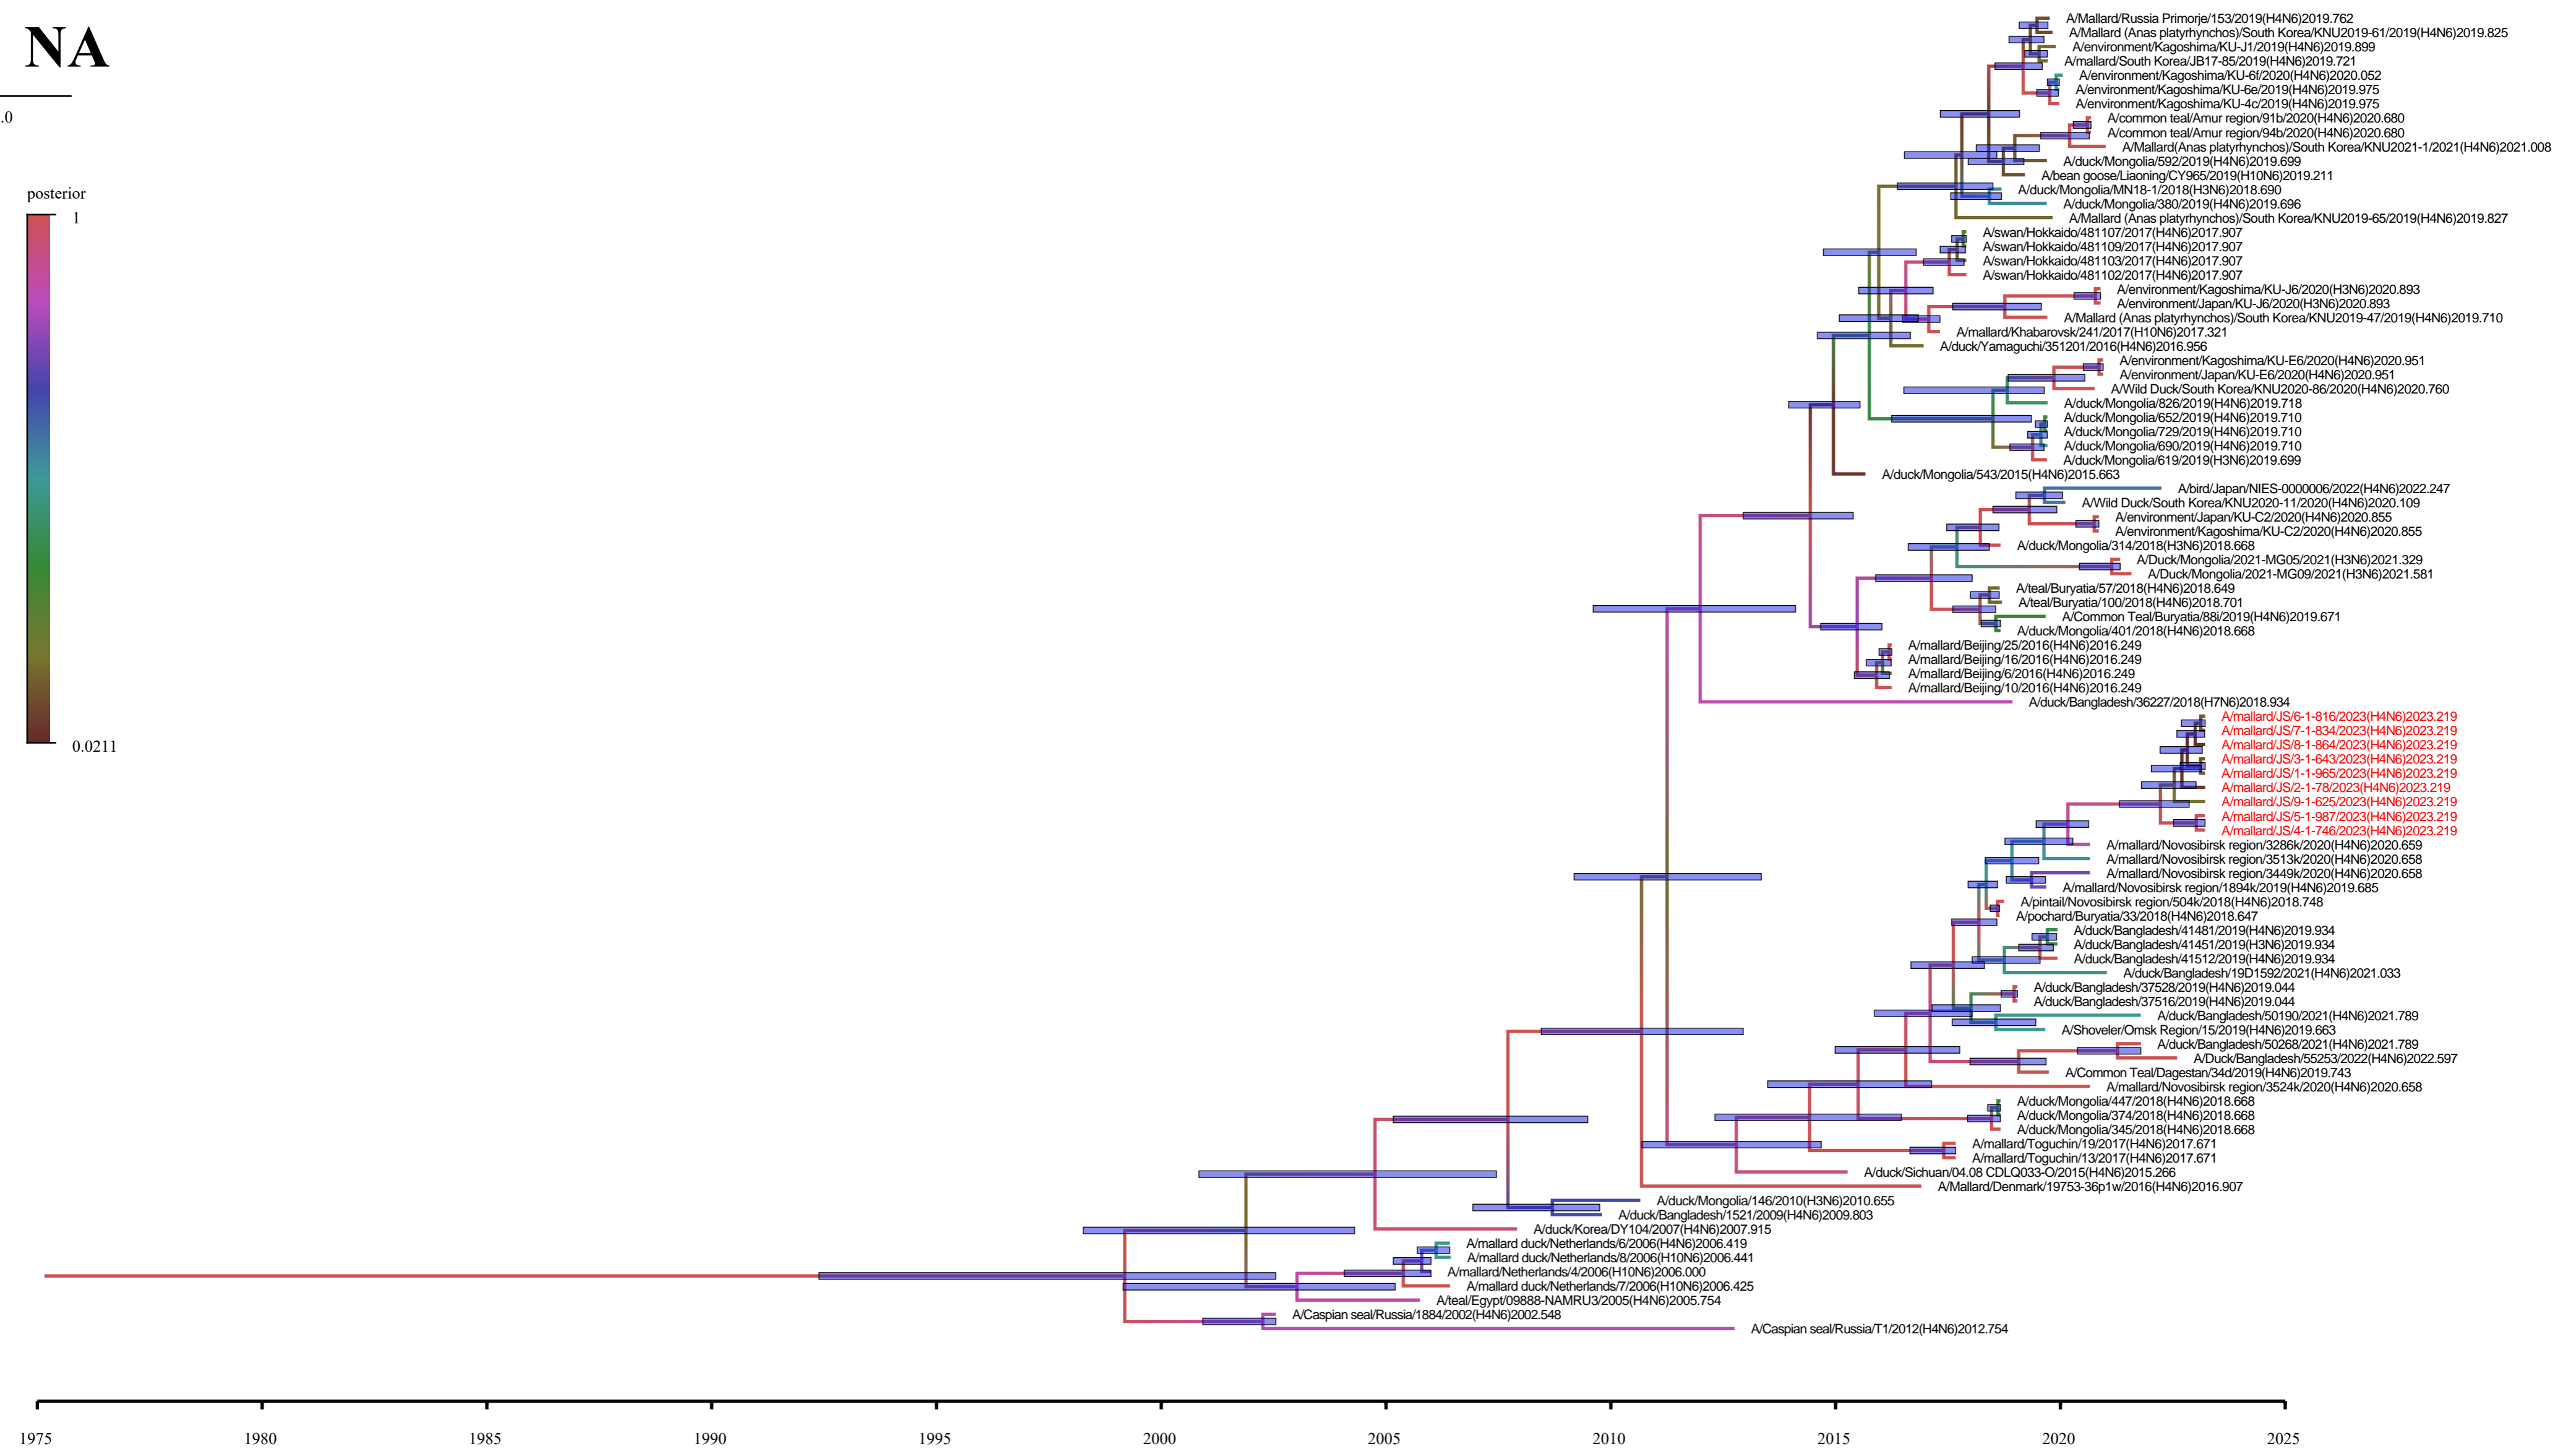

1975 1980 1985 1990 1995 2000 2005 2010 2015 2020 2025

(f) M

2.0

posterior

1

0.0002

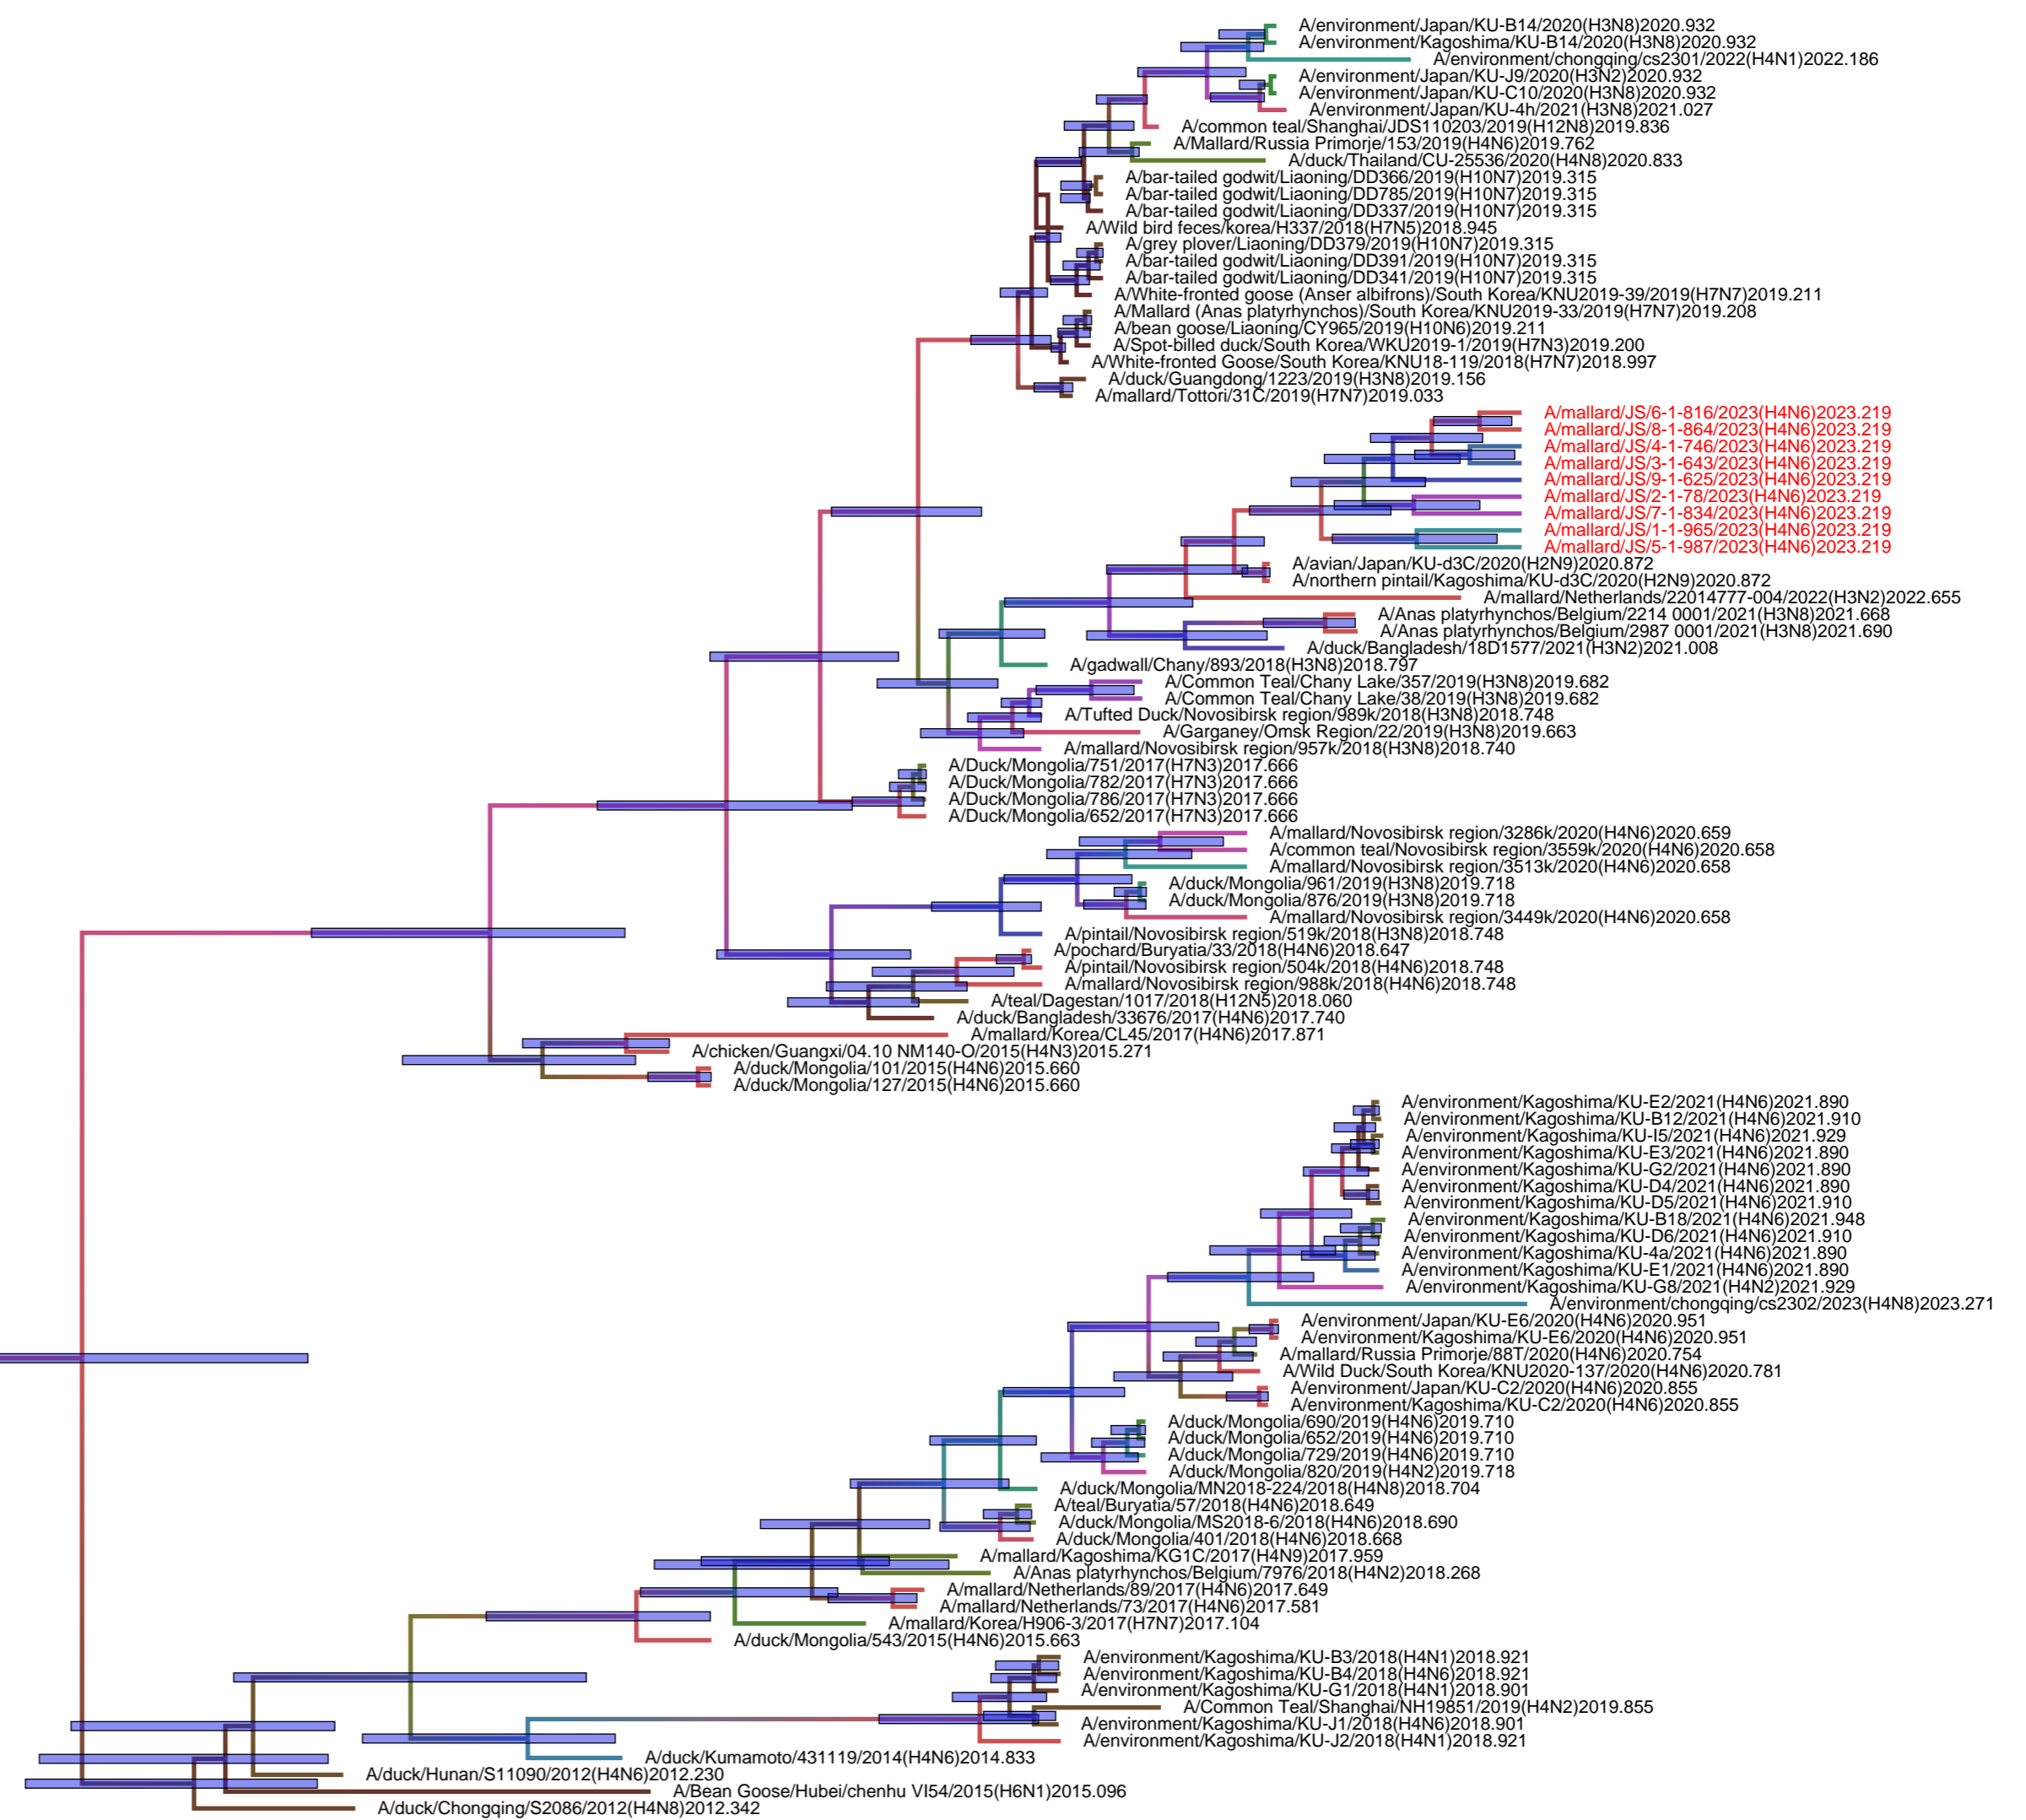

1995

2000

2005

2010

2015

2020

2025

(g) NS

2.0

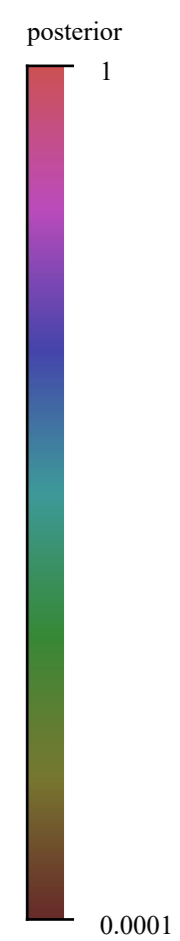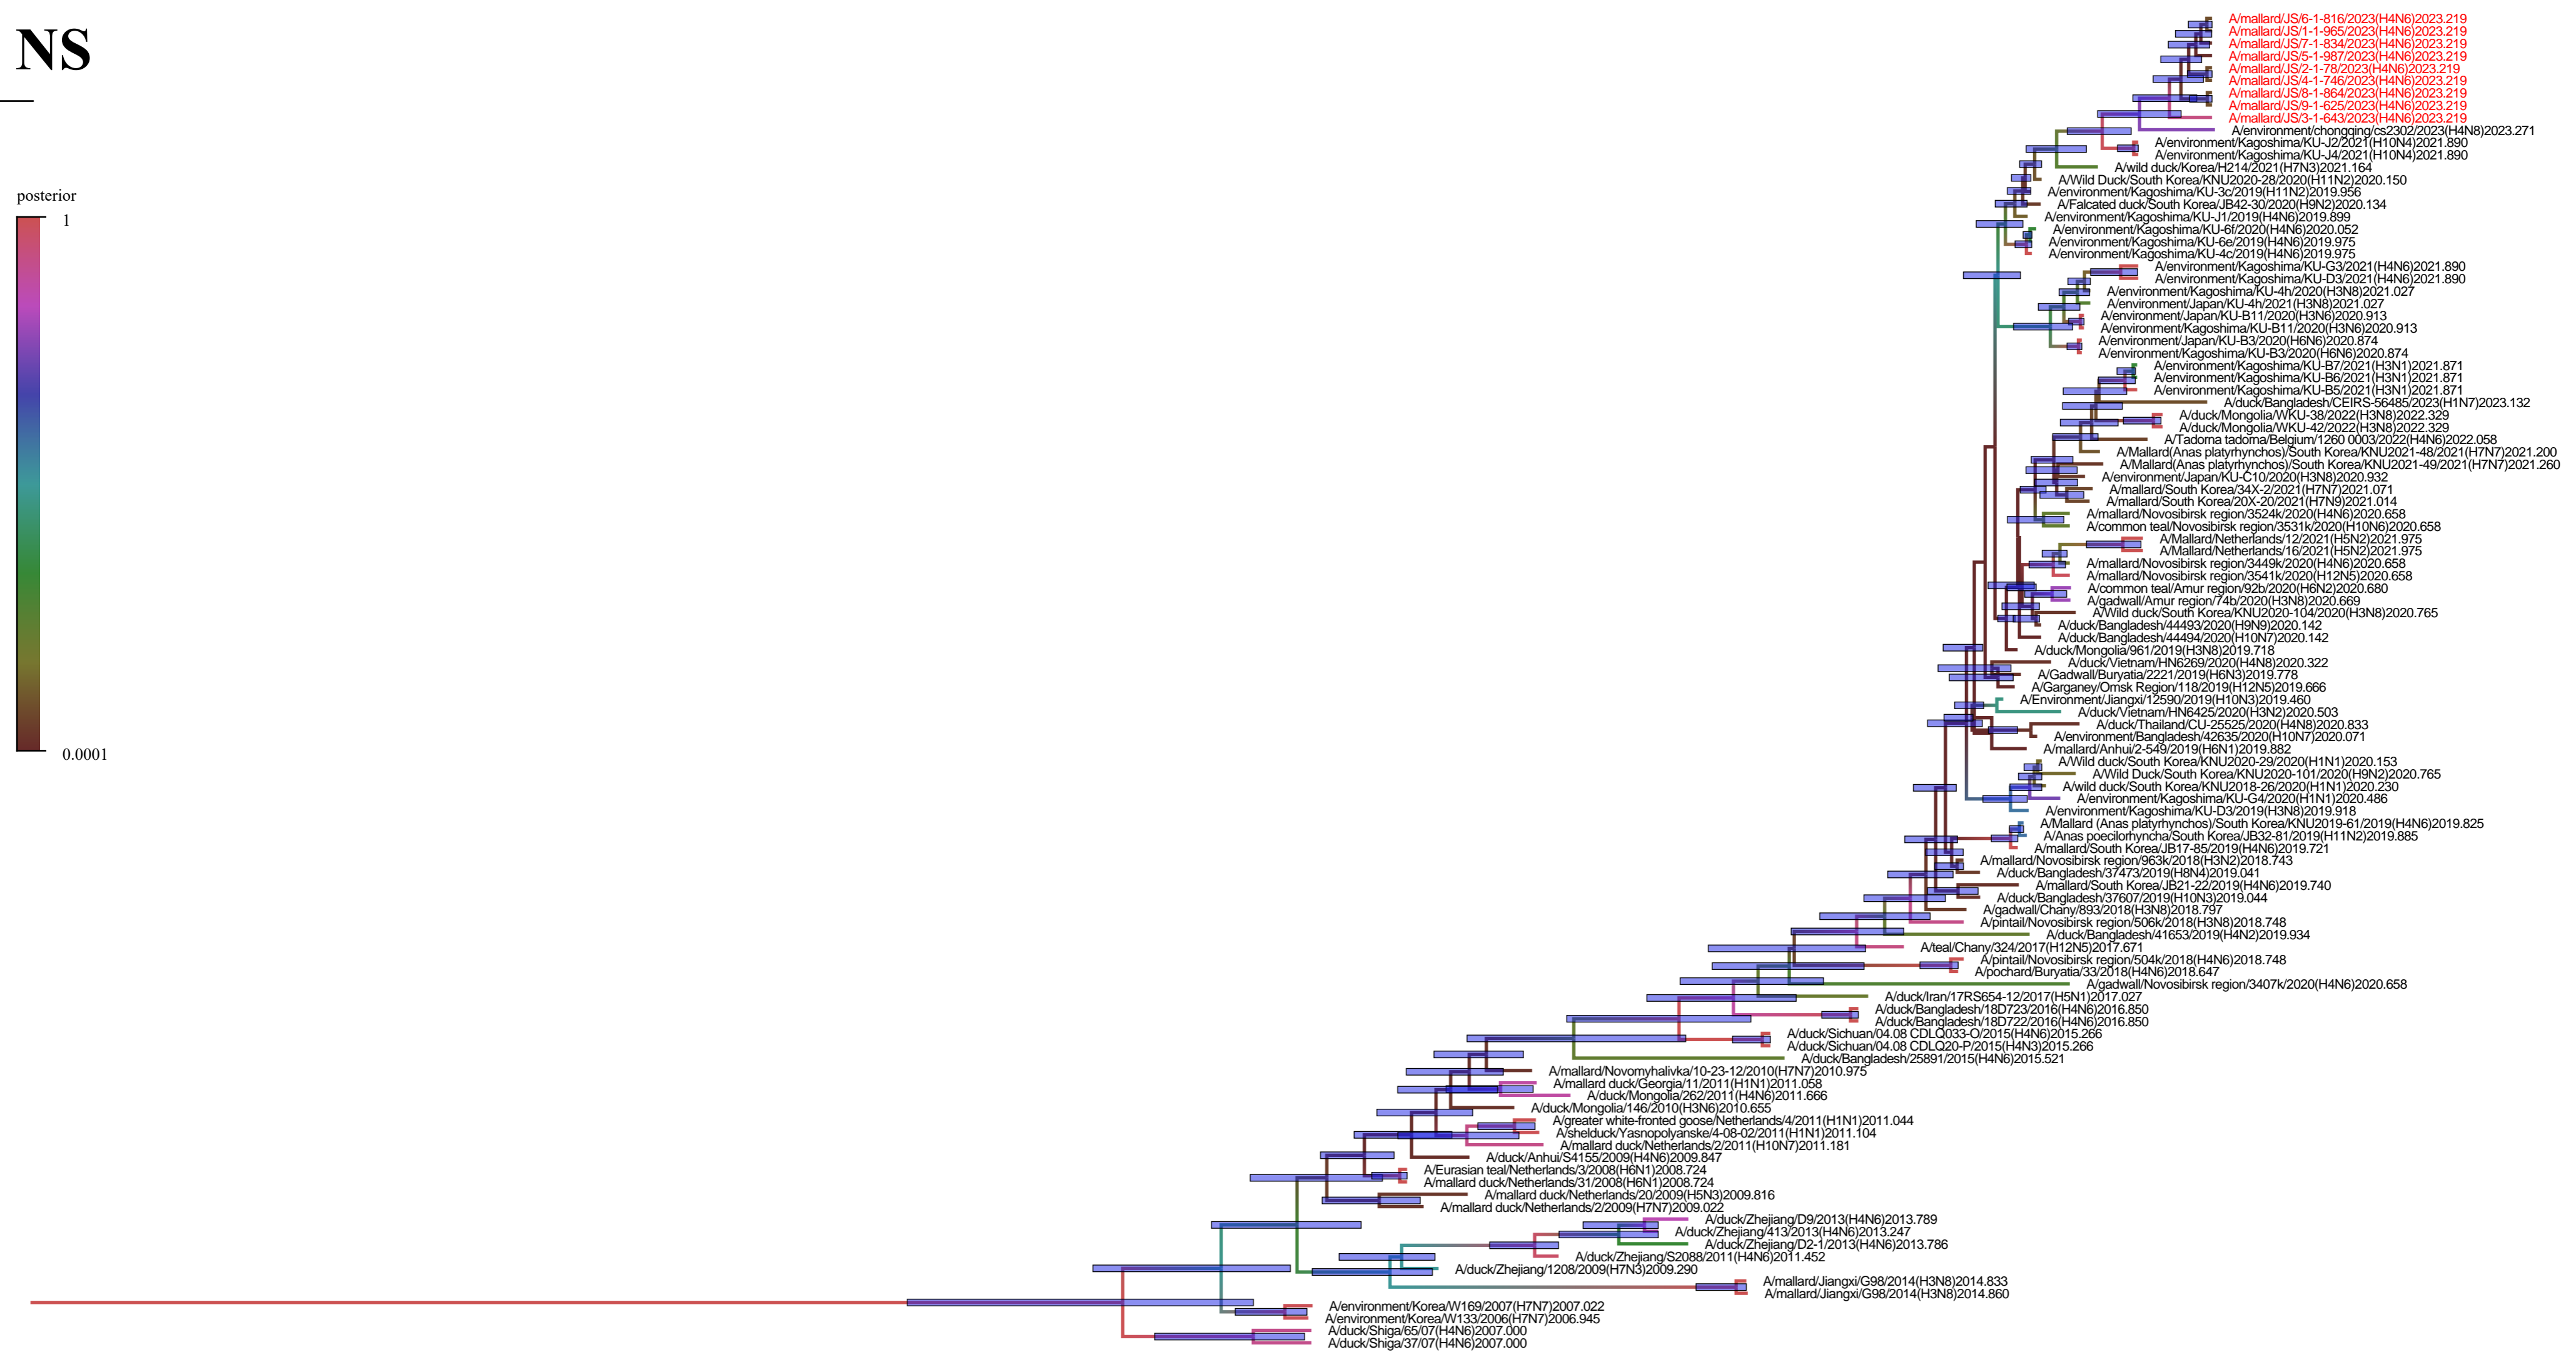

1982 1984 1986 1988 1990 1992 1994 1996 1998 2000 2002 2004 2006 2008 2010 2012 2014 2016 2018 2020 2022 2024
