# Supplementary material for: Genetics and Pathogenicity of Influenza A (H4N6) Virus Isolated from Wild Birds in Jiangsu Province, China, 2023
Source: Hindawi journal article supplement (doi:10.1155/2024/7421277), 2024-01-01

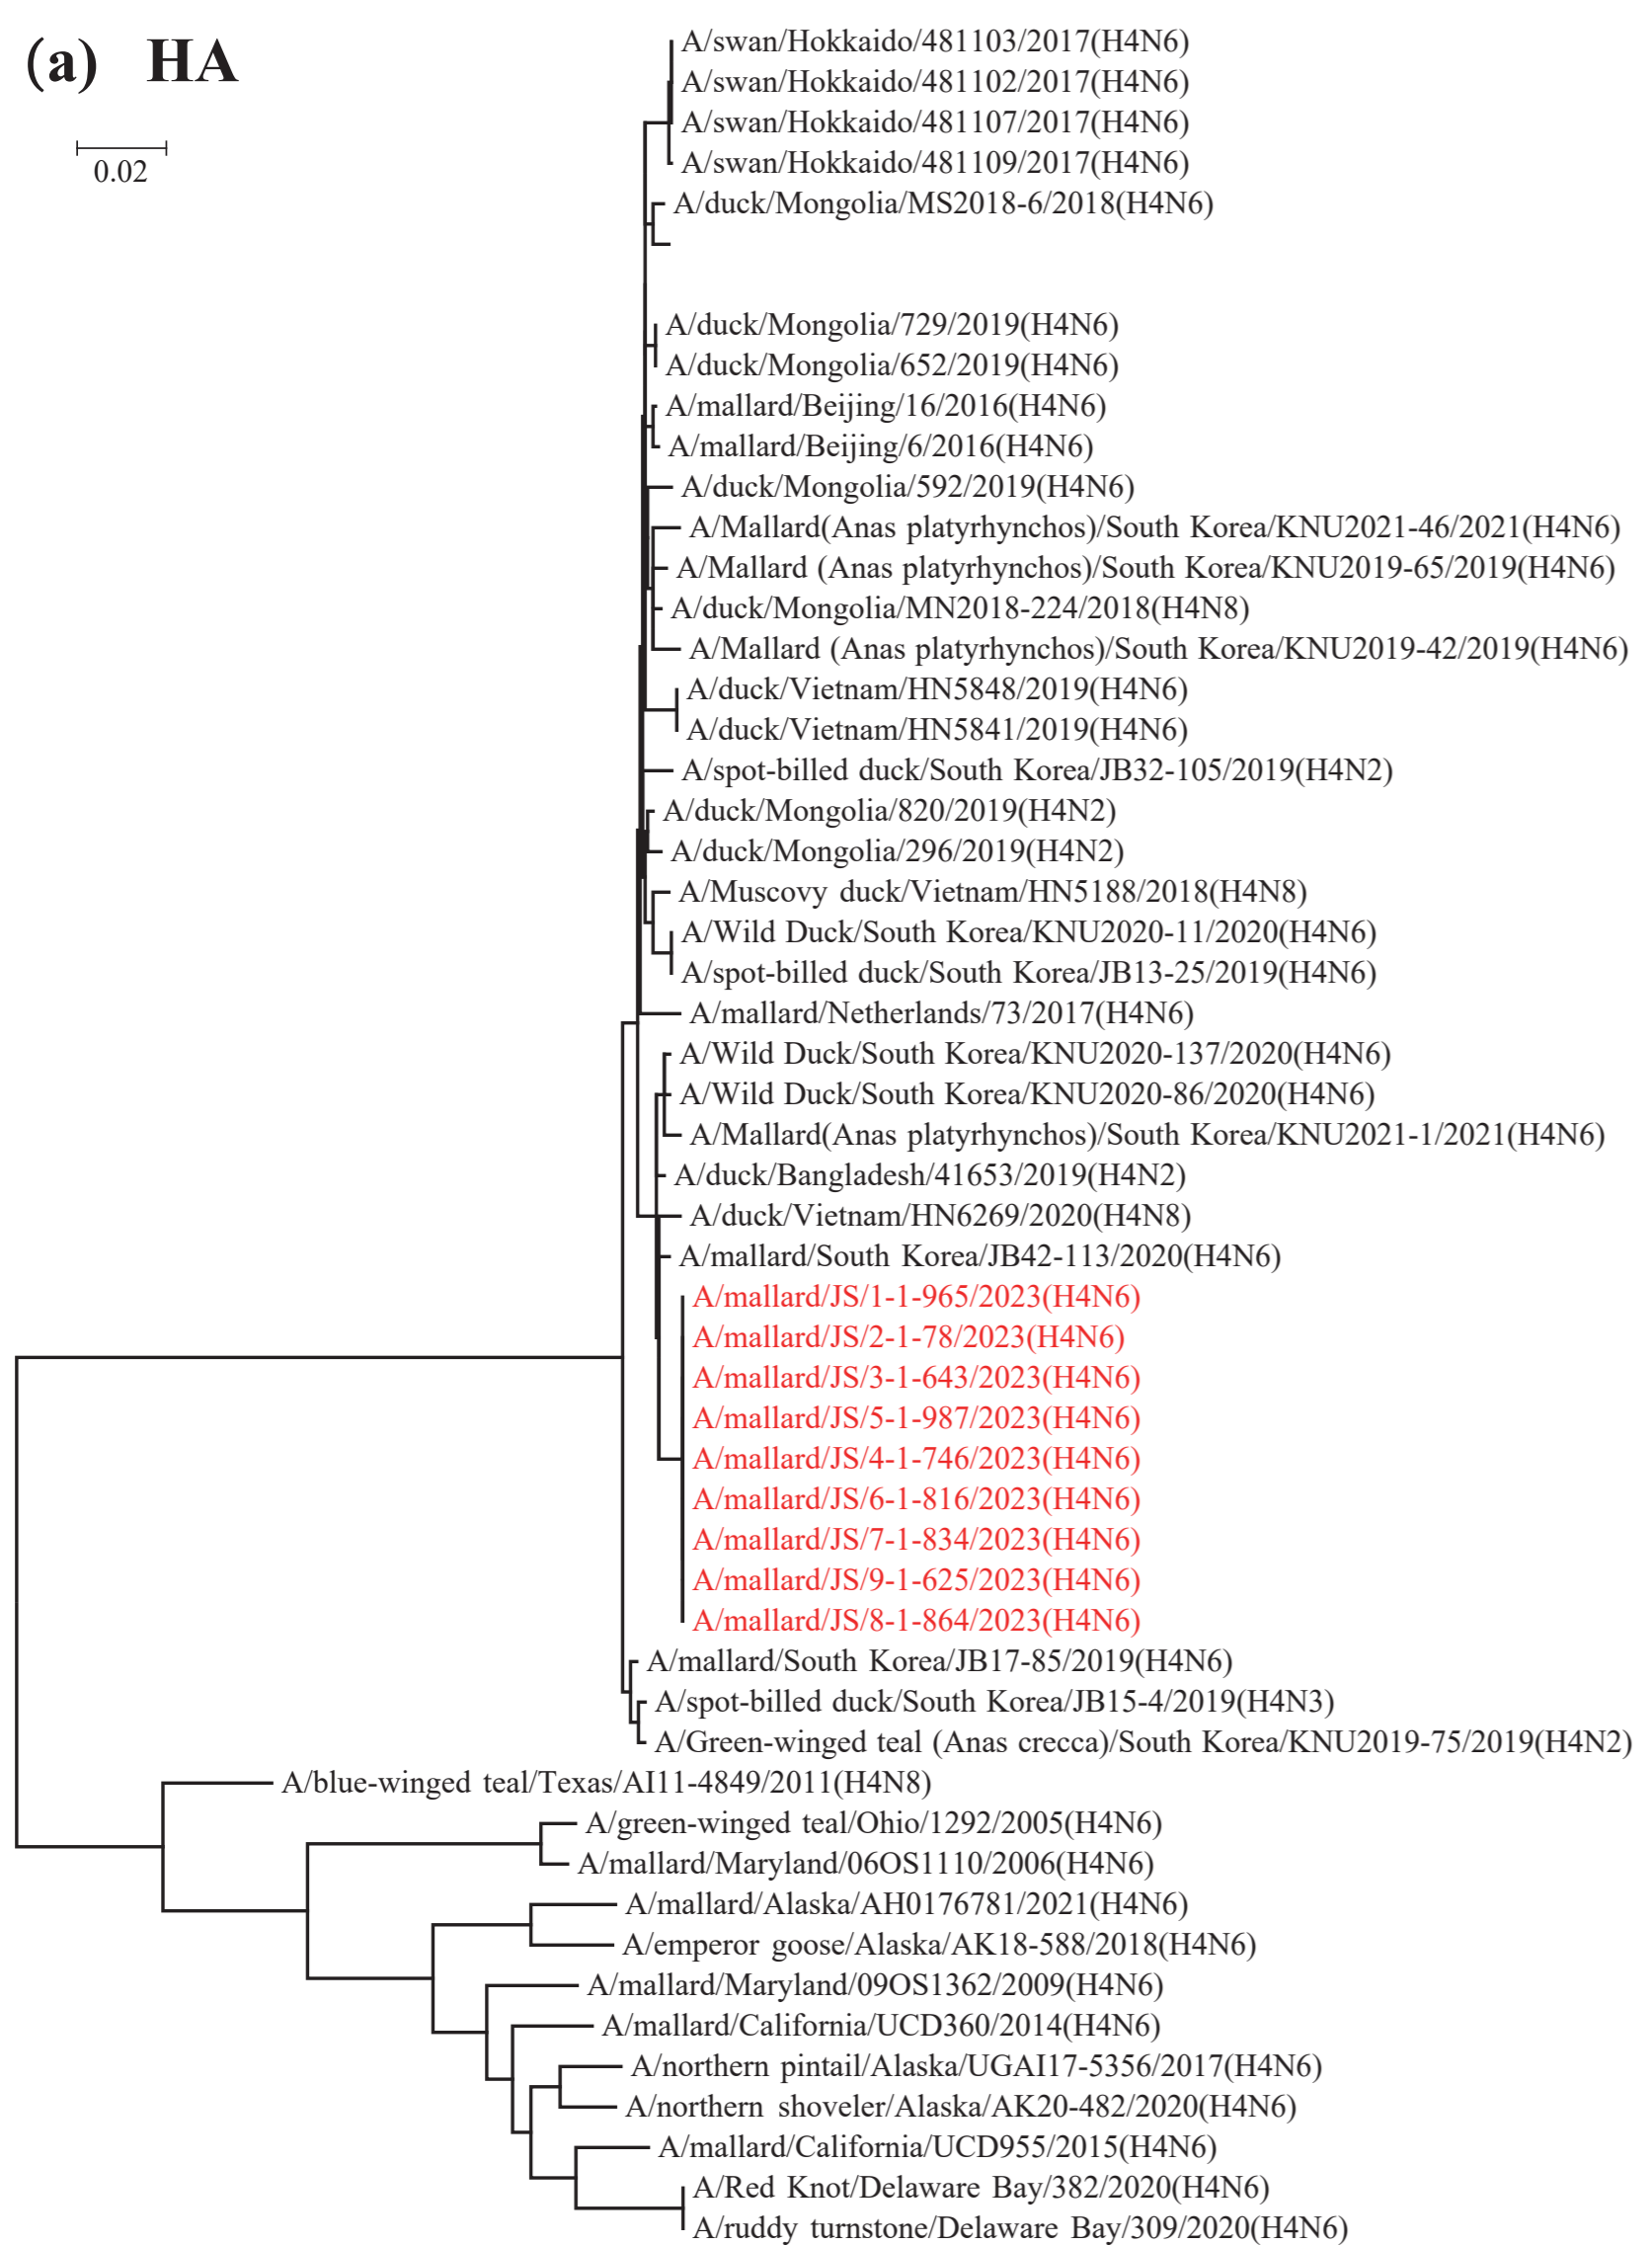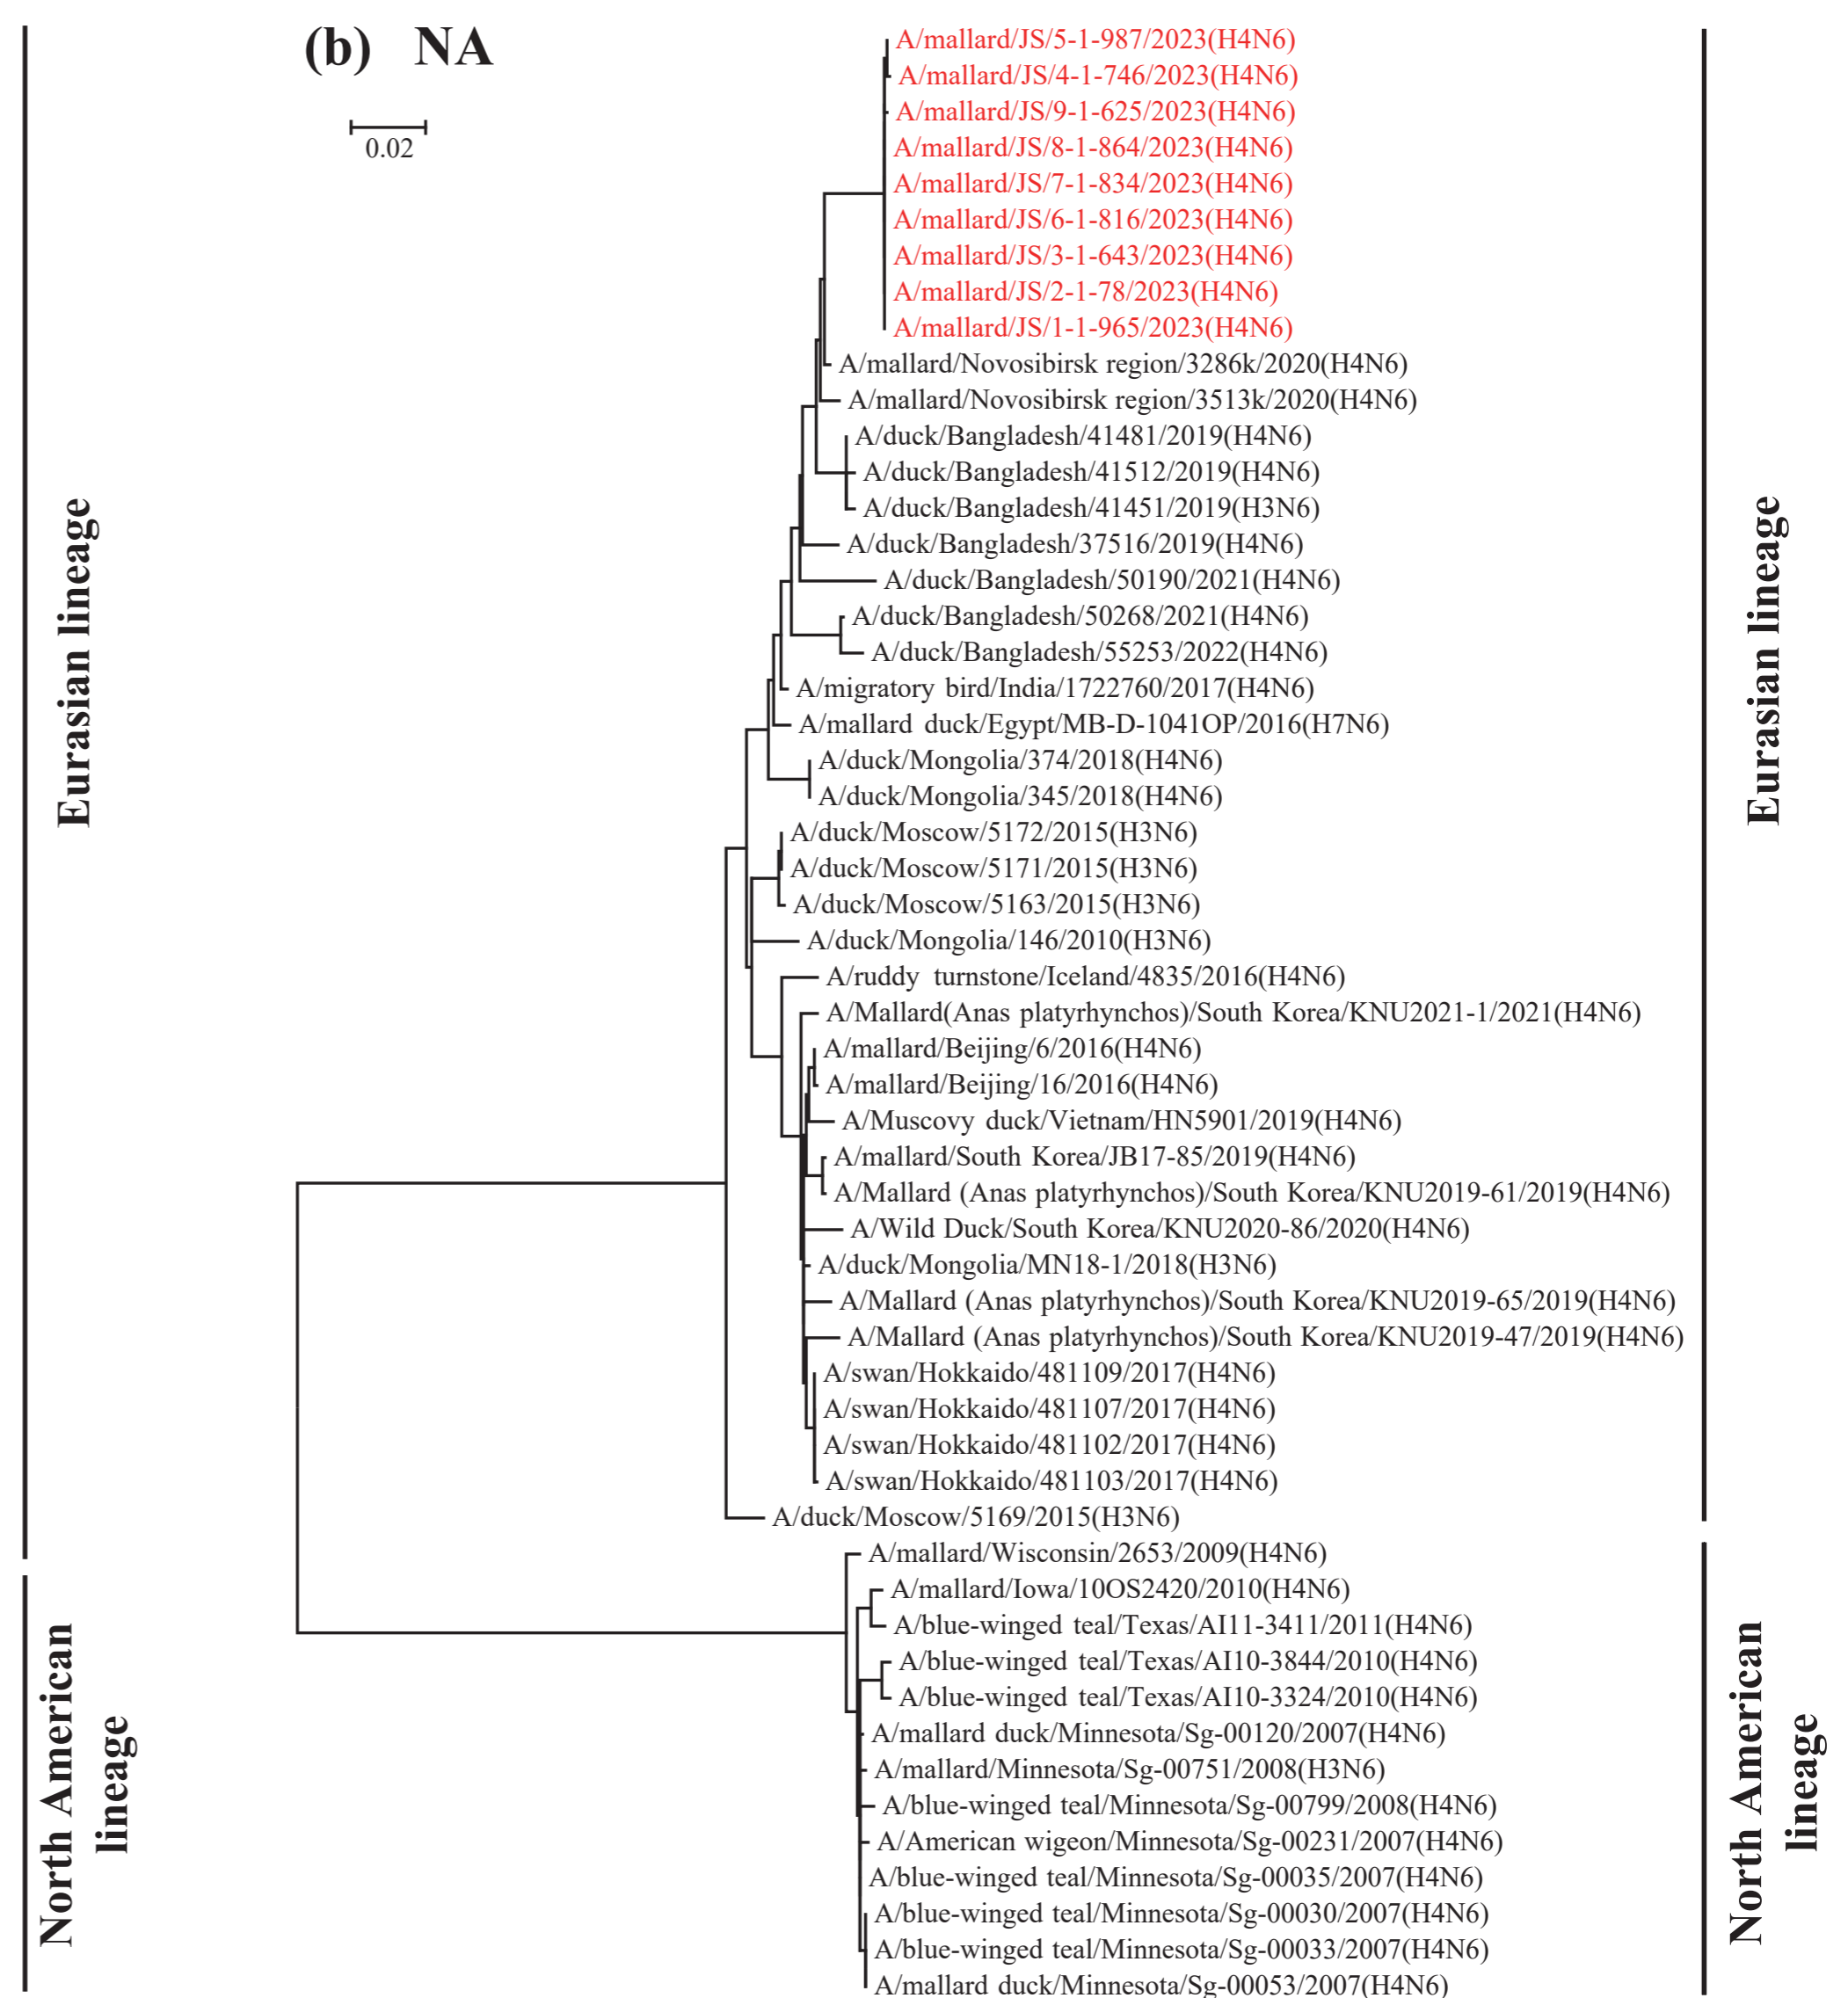

Supplement: f3 [file 7421277.f3.pdf]
